# Supplementary material for: Reduction of Central Line-associated Bloodstream Infection Through Focus on the Mesosystem: Standardization, Data, and Accountability
Source: PubMed Central journal article supplement (PMC7190265; doi:10.1097/pq9.0000000000000272), 2020-03-25
Supplement: pqs-5-e272-s002.pdf [file pqs-5-e272-s002.pdf]

SDC, Table. Hospital-wide and neonatal intensive care unit central line-associated bloodstream infection rate during years 2015-2018

| Year | Hospital-wide CLABSI rate | NICU CLABSI rate | Hospital-wide CLABSI rate without NICU |
|------|---------------------------|------------------|----------------------------------------|
| 2015 | 1.64                      | 2.46             | 1.46                                   |
| 2016 | 1.59                      | 2.32             | 1.45                                   |
| 2017 | 1.74                      | 2.29             | 1.65                                   |
| 2018 | 0.79                      | 0.27             | 0.86                                   |

CLABSI, central line-associated bloodstream infection; NICU, neonatal intensive care unit
